# Supplementary figures and images for: A Novel Assay for Profiling GBM Cancer Model Heterogeneity and Drug Screening
Source: MDPI journal article supplement (doi:10.3390/cells8070702), 2019-07-11

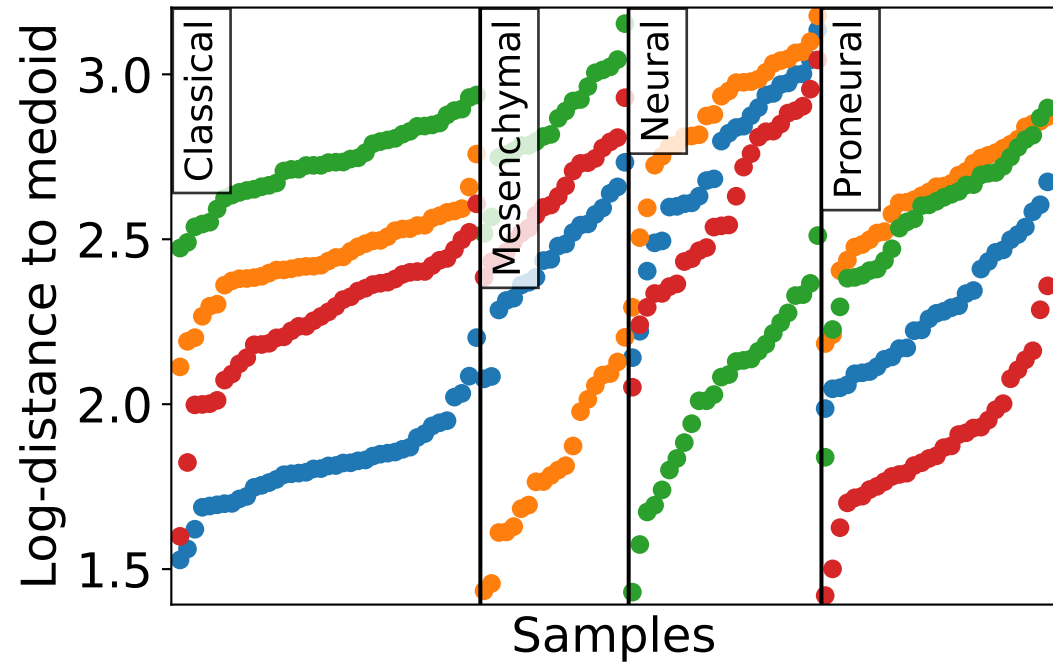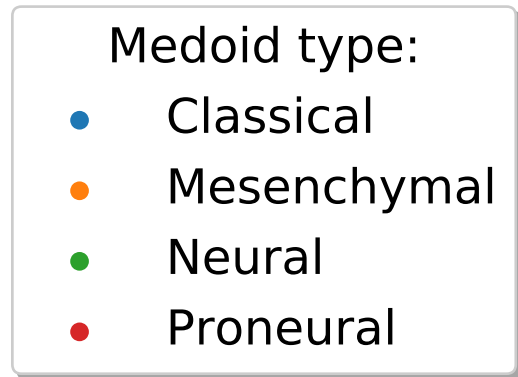

Supplement: s1 [file s1]

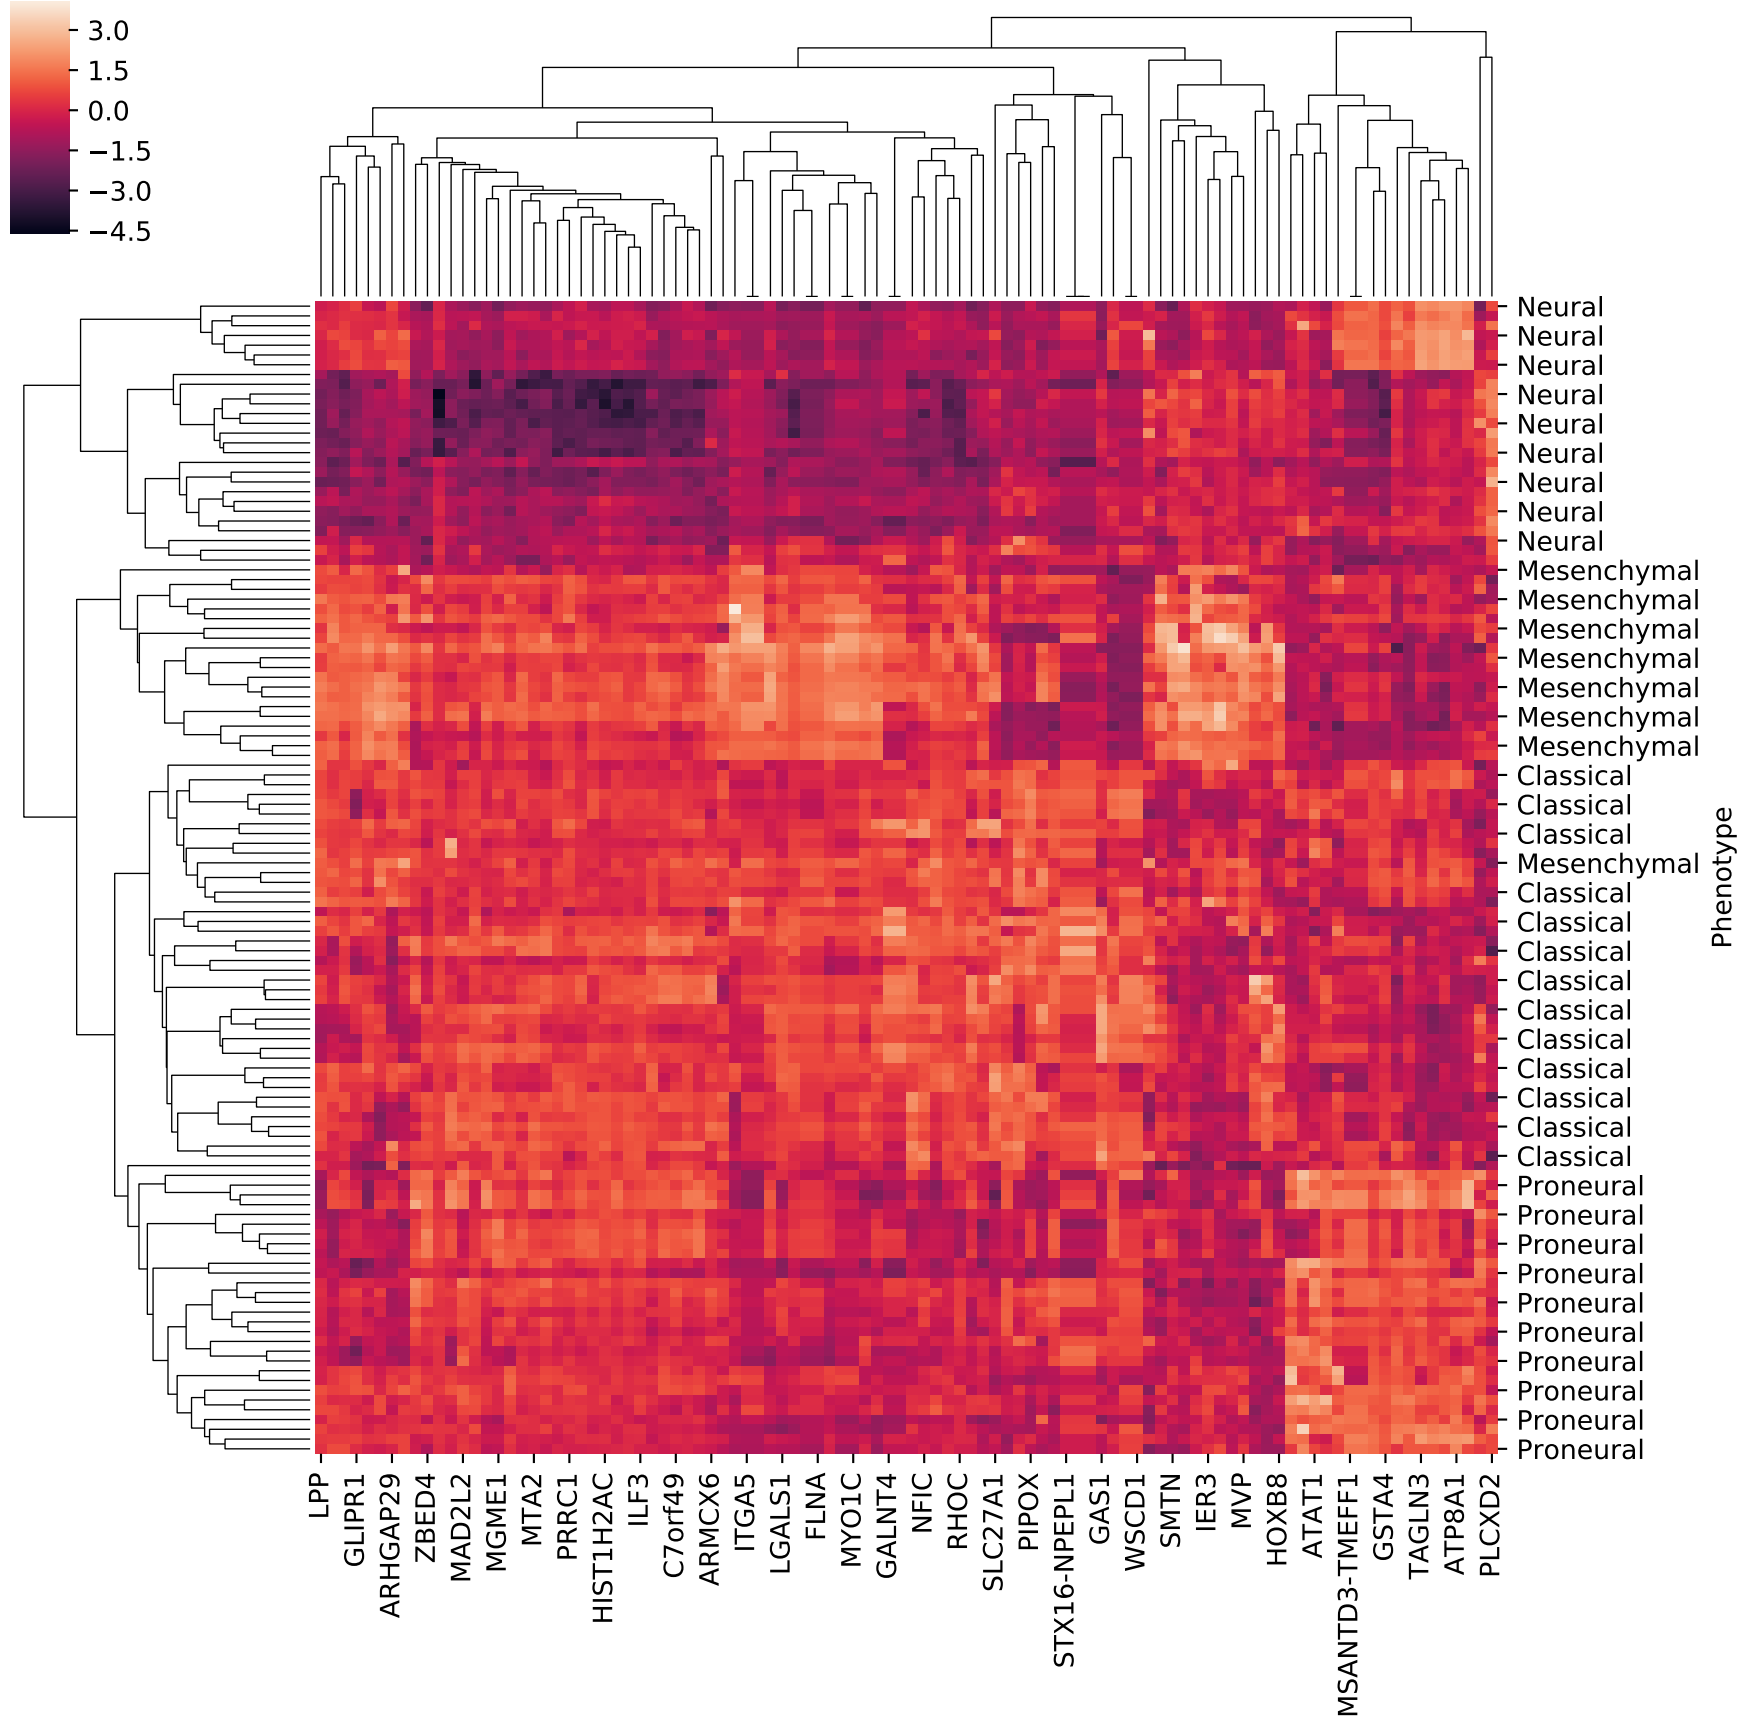

Supplement: s1 [file s1]

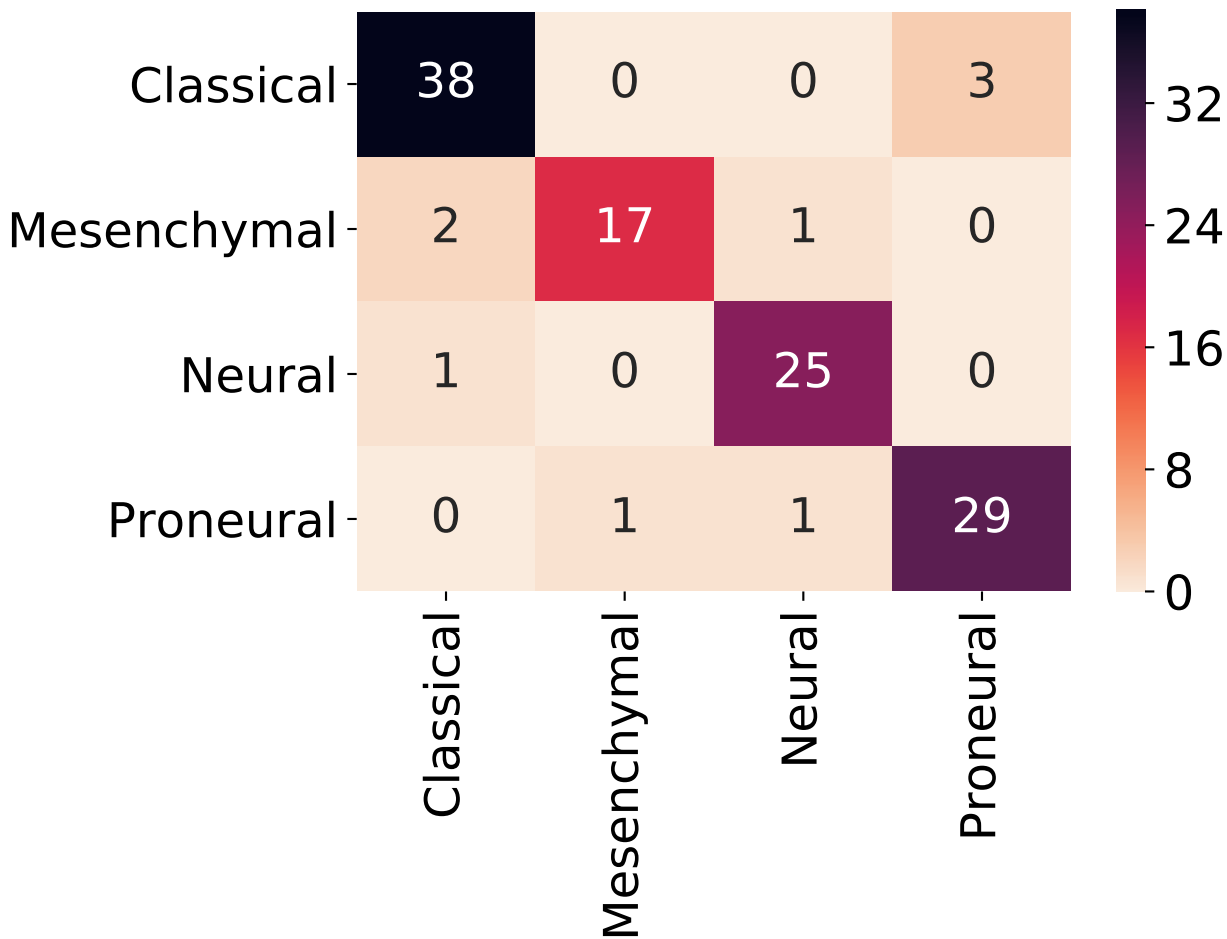

Supplement: s1 [file s1]
